# Supplementary material
Source: PubMed Central journal article supplement (PMC4597998)
Supplement: supp_35.5.597_Supplemental_Material.pdf [file supp_35.5.597_Supplemental_Material.pdf]

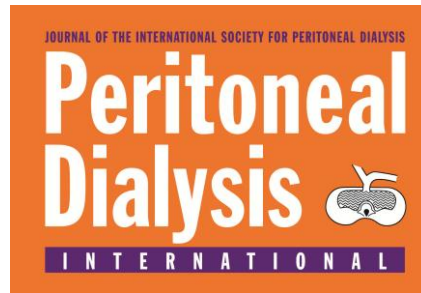

## Supplemental Materials for

### Incidence and Predictors of Zinc Deficiency in Stable Peritoneal Dialysis Patients

Andrew Davenport and Kwanpeemai Panorchan

**Supplemental** Table 1: Patients divided according to those with a lowered plasma zinc concentration and those with a normal value. There were no statistical differences between the two groups. Data presented as numbers, mean and standard deviation or median and (25-75% confidence limits) or percentages.

|                                     | Zinc level < 11 umol/l | Zinc level ≥11 umol/l |
|-------------------------------------|------------------------|-----------------------|
| Mean age year                       | 58±16                  | 58±16                 |
| Male sex %                          | 60.9                   | 38.4                  |
| Diabetes %                          | 25.3                   | 33.8                  |
| Dialysis vintage months             | 9 (2-23)               | 14 (3-33)             |
| Total weekly Kt/V <sub>urea</sub>   | 2.52±0.96              | 2.50 ±1.15            |
| Urinary creatinine clearance ml/min | 6 (2-12)               | 4 (2-9)               |
| Beta 2 microglobulin mg/l           | 28.6±17.3              | 24.8±10.7             |
| Body weight kg                      | 76.5±16.8              | 71.6±13.4             |
| BMI kg/m <sup>2</sup>               | 26.7±4.6               | 26.9±4.6              |
| nPNA g/kg/day                       | 0.90±0.25              | 0.89±0.30             |
| Serum urea mmol/l                   | 18.1±5.7               | 17.1±4.6              |
| Serum phosphate mmol/l              | 1.52±0.45              | 1.56±0.42             |
| Serum albumin g/l                   | 37±4                   | 39±4                  |
| C-reactive protein mg/l             | 3 (1-8)                | 4 (1-6)               |
| Copper umol/l                       | 17.0±3.6               | 16.8±4.7              |
| Selenium umol/l                     | 0.87±0.21              | 0.86±0.24             |
| Total cholesterol mmol/l            | 5±1                    | 5±1                   |
| LDL cholesterol mmol/l              | 2.4±1                  | 2.3±0.9               |
| PD protein loss g/day               | 5.81±2.69              | 5.13±2.51             |
| Sevelamer use %                     | 18.4                   | 13.8                  |

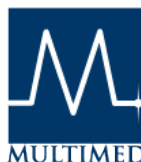

Supplemental Table 2: The effect of phosphate binders on serum trace elements and serum lipids. Percentage of patients co-prescribed HMG CoA3 reductase inhibitors (statins). Data presented as numbers, mean and standard deviation or median and (25-75% confidence limits) or percentages. There were no statistical differences between groups.

|                          | No binder | Non-sevelamer | Sevelamer |
|--------------------------|-----------|---------------|-----------|
| Number of case           | 58        | 69            | 25        |
| Zinc umol/l              | 11.4±3.0  | 10.8±2.7      | 11.2±2.9  |
| Copper umol/l            | 17.6±4.2  | 16.7±3.7      | 16.2±4.4  |
| Selenium mmol/l          | 0.87±0.20 | 0.87±0.26     | 0.83±0.18 |
| Magnesium mmol/l         | 0.81±0.15 | 0.84±0.18     | 0.86±0.17 |
| Total cholesterol mmol/l | 5.0±1.0   | 5.0±1.0       | 5.0±2.0   |
| HDL cholesterol mmol/l   | 1.4±0.5   | 1.5±0.9       | 1.3±0.6   |
| LDL cholesterol mmol/l   | 2.3±0.9   | 2.5±1.0       | 2.1±1.1   |
| Statins used %           | 35.7%     | 61.9%         | 70.8%     |



MULTIMED
